# Supplementary material for: One step thermal conversion of lignin to the gasoline range liquid products by using zeolites as additives
Source: Royal Society of Chemistry journal article supplement (doi:10.1039/c2ra22616b), 2012-01-01
Supplement: c2ra22616b.pdf [file c2ra22616b.pdf]

## **Supporting information**

# **One step thermal conversion of lignin to the gasoline range liquid products by using zeolites as additives**

*Haoxi Ben<sup>1,2</sup> and Arthur J. Ragauskas<sup>\*1,2</sup>*

<sup>1</sup> School of Chemistry and Biochemistry, Georgia Institute of Technology, Atlanta, GA 30332, USA.

<sup>2</sup> Institute of Paper Science and Technology, Georgia Institute of Technology, Atlanta, GA 30332, USA.

30332, USA.

\*Correspondence should be addressed to Arthur J. Ragauskas

Email: Art.Ragauskas@chemistry.gatech.edu

### GC-MS analysis of pyrolysis products

The GC-MS analysis of pyrolysis products was conducted by Agilent 5975C MSD and 7890A GC with a 7693 auto sampler. The Agilent HP-5MS, 19091S-433 column was used. The GC oven was programmed with the following temperature regime: hold at 50 °C for 5 min, ramp to 80 °C at 5 °C/min and hold at 80 °C for 5 min, then ramp to 200 °C at 2 °C/min and hold at 200 °C for 5 min.

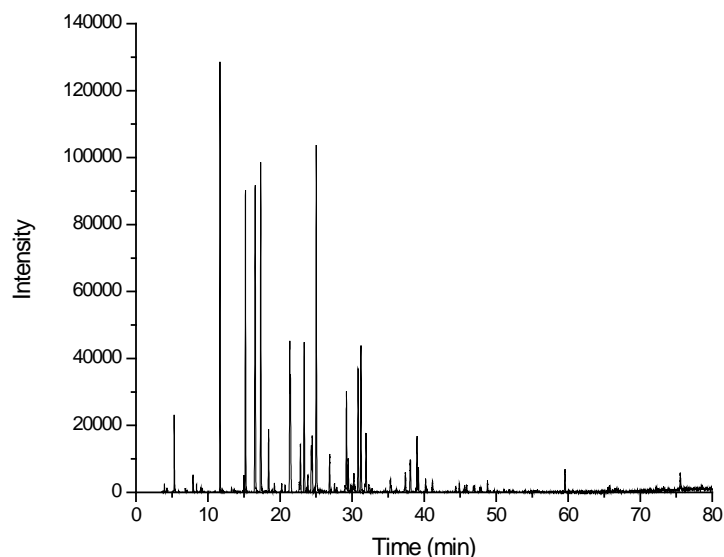

**Figure S1.** GC-MS spectrum for the heavy oil produced by pyrolysis of pure SW kraft lignin with 1.0/1.0 ( $W_{\text{additive}}/W_{\text{lignin}}$ ) of Y zeolite as additive at 600 °C for 10 min.

**Table S1. Chemical composition of heavy oil produced by pyrolysis of pure SW kraft lignin with 1.0/1.0 ( $W_{\text{additive}}/W_{\text{lignin}}$ ) of Y zeolite as additive at 600 °C for 10 min, detected by GC-MS.**

| RT (min) | Area (%) | Chemical name             |
|----------|----------|---------------------------|
| 5.30     | 1.65     | 3-Penten-2-one, 4-methyl- |
| 11.67    | 9.25     | Phenol                    |
| 15.20    | 9.13     | Phenol, 2-methyl-         |
| 16.55    | 14.31    | Phenol, 3-methyl-         |
| 17.32    | 11.49    | Phenol, 2-methoxy-        |

|       |       |                             |
|-------|-------|-----------------------------|
| 18.41 | 2.09  | Phenol, 2,6-dimethyl-       |
| 21.35 | 5.18  | Phenol, 2,4-dimethyl-       |
| 21.44 | 4.51  | Phenol, 2,4-dimethyl-       |
| 22.83 | 1.82  | Phenol, 3,5-dimethyl-       |
| 23.35 | 6.22  | Naphthalene                 |
| 24.34 | 1.57  | Phenol, 2-methoxy-4-methyl- |
| 24.47 | 2.21  | Phenol, 3,4-dimethyl-       |
| 25.03 | 12.62 | 1,2-Benzenediol             |
| 29.22 | 3.53  | 1,2-Benzenediol, 3-methyl-  |
| 30.84 | 4.78  | Naphthalene, 1-methyl-      |
| 31.24 | 5.60  | 1,2-Benzenediol, 4-methyl-  |
| 31.94 | 2.09  | Naphthalene, 1-methyl-      |
| 39.02 | 1.93  | Naphthalene, 1,4-dimethyl-  |

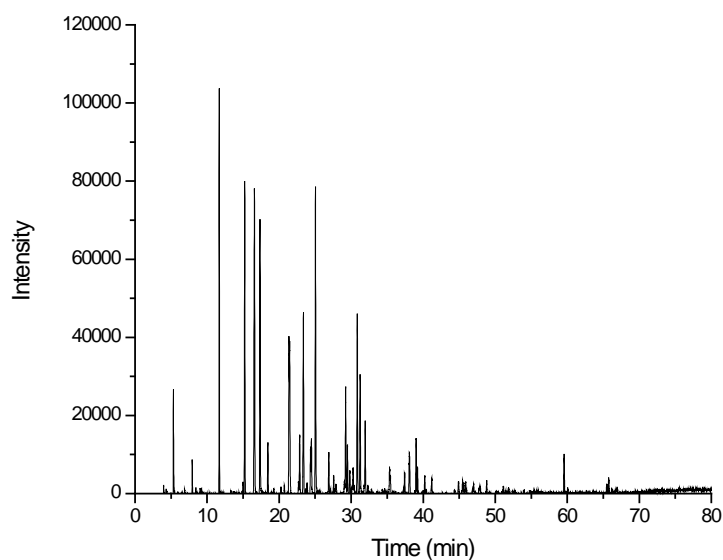

**Figure S2.** GC-MS spectrum for the heavy oil produced by pyrolysis of pure SW kraft lignin with 1.0/1.0 ( $W_{\text{additive}}/W_{\text{lignin}}$ ) of Beta zeolite as additive at 600 °C for 10 min.

**Table S2. Chemical composition of heavy oil produced by pyrolysis of pure SW kraft lignin with 1.0/1.0 ( $W_{\text{additive}}/W_{\text{lignin}}$ ) of Beta zeolite as additive at 600 °C for 10 min, detected by GC-MS.**

| RT (min) | Area (%) | Chemical name              |
|----------|----------|----------------------------|
| 5.32     | 2.34     | 3-Penten-2-one, 4-methyl-  |
| 11.69    | 9.15     | Phenol                     |
| 15.23    | 9.96     | Phenol, 2-methyl-          |
| 16.58    | 14.95    | Phenol, 4-methyl-          |
| 17.34    | 9.96     | Phenol, 2-methoxy-         |
| 21.38    | 5.41     | Phenol, 2,4-dimethyl-      |
| 21.46    | 5.92     | Phenol, 2,5-dimethyl-      |
| 22.85    | 2.12     | Phenol, 3,5-dimethyl-      |
| 23.37    | 7.53     | Azulene                    |
| 25.04    | 11.82    | 1,2-Benzenediol            |
| 29.23    | 3.78     | 1,2-Benzenediol, 3-methyl- |
| 30.85    | 7.14     | Naphthalene, 2-methyl-     |
| 31.25    | 4.68     | 1,2-Benzenediol, 4-methyl- |
| 31.95    | 3.19     | Naphthalene, 2-methyl-     |
| 39.02    | 2.08     | Naphthalene, 1,3-dimethyl- |
